# Supplementary material for: Land-use management unevenly amplifies urban browning in a greening world
Source: Research Square preprint supplement (doi:10.21203/rs.3.rs-8093706/v1), 2026-01-16
Supplement: Supplementary file 1 [file ee63a94f19463b40825356b6.docx]

Supplementary Information

**Land-use management unevenly amplifies urban browning in a greening world**

**Authors:** Long Li1,2, Peiqi Yang1,2*, Wenfeng Zhan3*, Yitao Li4, Jing Liu1,2, Wenmin Zhang5, and Josep Peñuelas6,7

**Affiliations:**

1State Key Laboratory of Climate System Prediction and Risk Management, Nanjing Normal University, Nanjing, China

2Jiangsu Center for Collaborative Innovation in Geographical Information Resource Development and Application, Nanjing Normal University, Nanjing, China

3International Institute for Earth System Science, Nanjing University, Nanjing, China

4Department of Earth System Science, Ministry of Education Key Laboratory for Earth System Modelling, Institute for Global Change Studies, Tsinghua University, Beijing, China

5School of Geographic Sciences, East China Normal University, Shanghai, China

6CSIC, Global Ecology Unit CREAF-CSIC-UAB-UB Bellaterra, Barcelona, Catalonia, Spain

7CREAF, Bellaterra, Barcelona, Catalonia, Spain

*Corresponding author. Email: p.yang@njnu.edu.cn, zhanwenfeng@nju.edu.cn

This file includes:

Supplementary figures

Figures S1 to S10


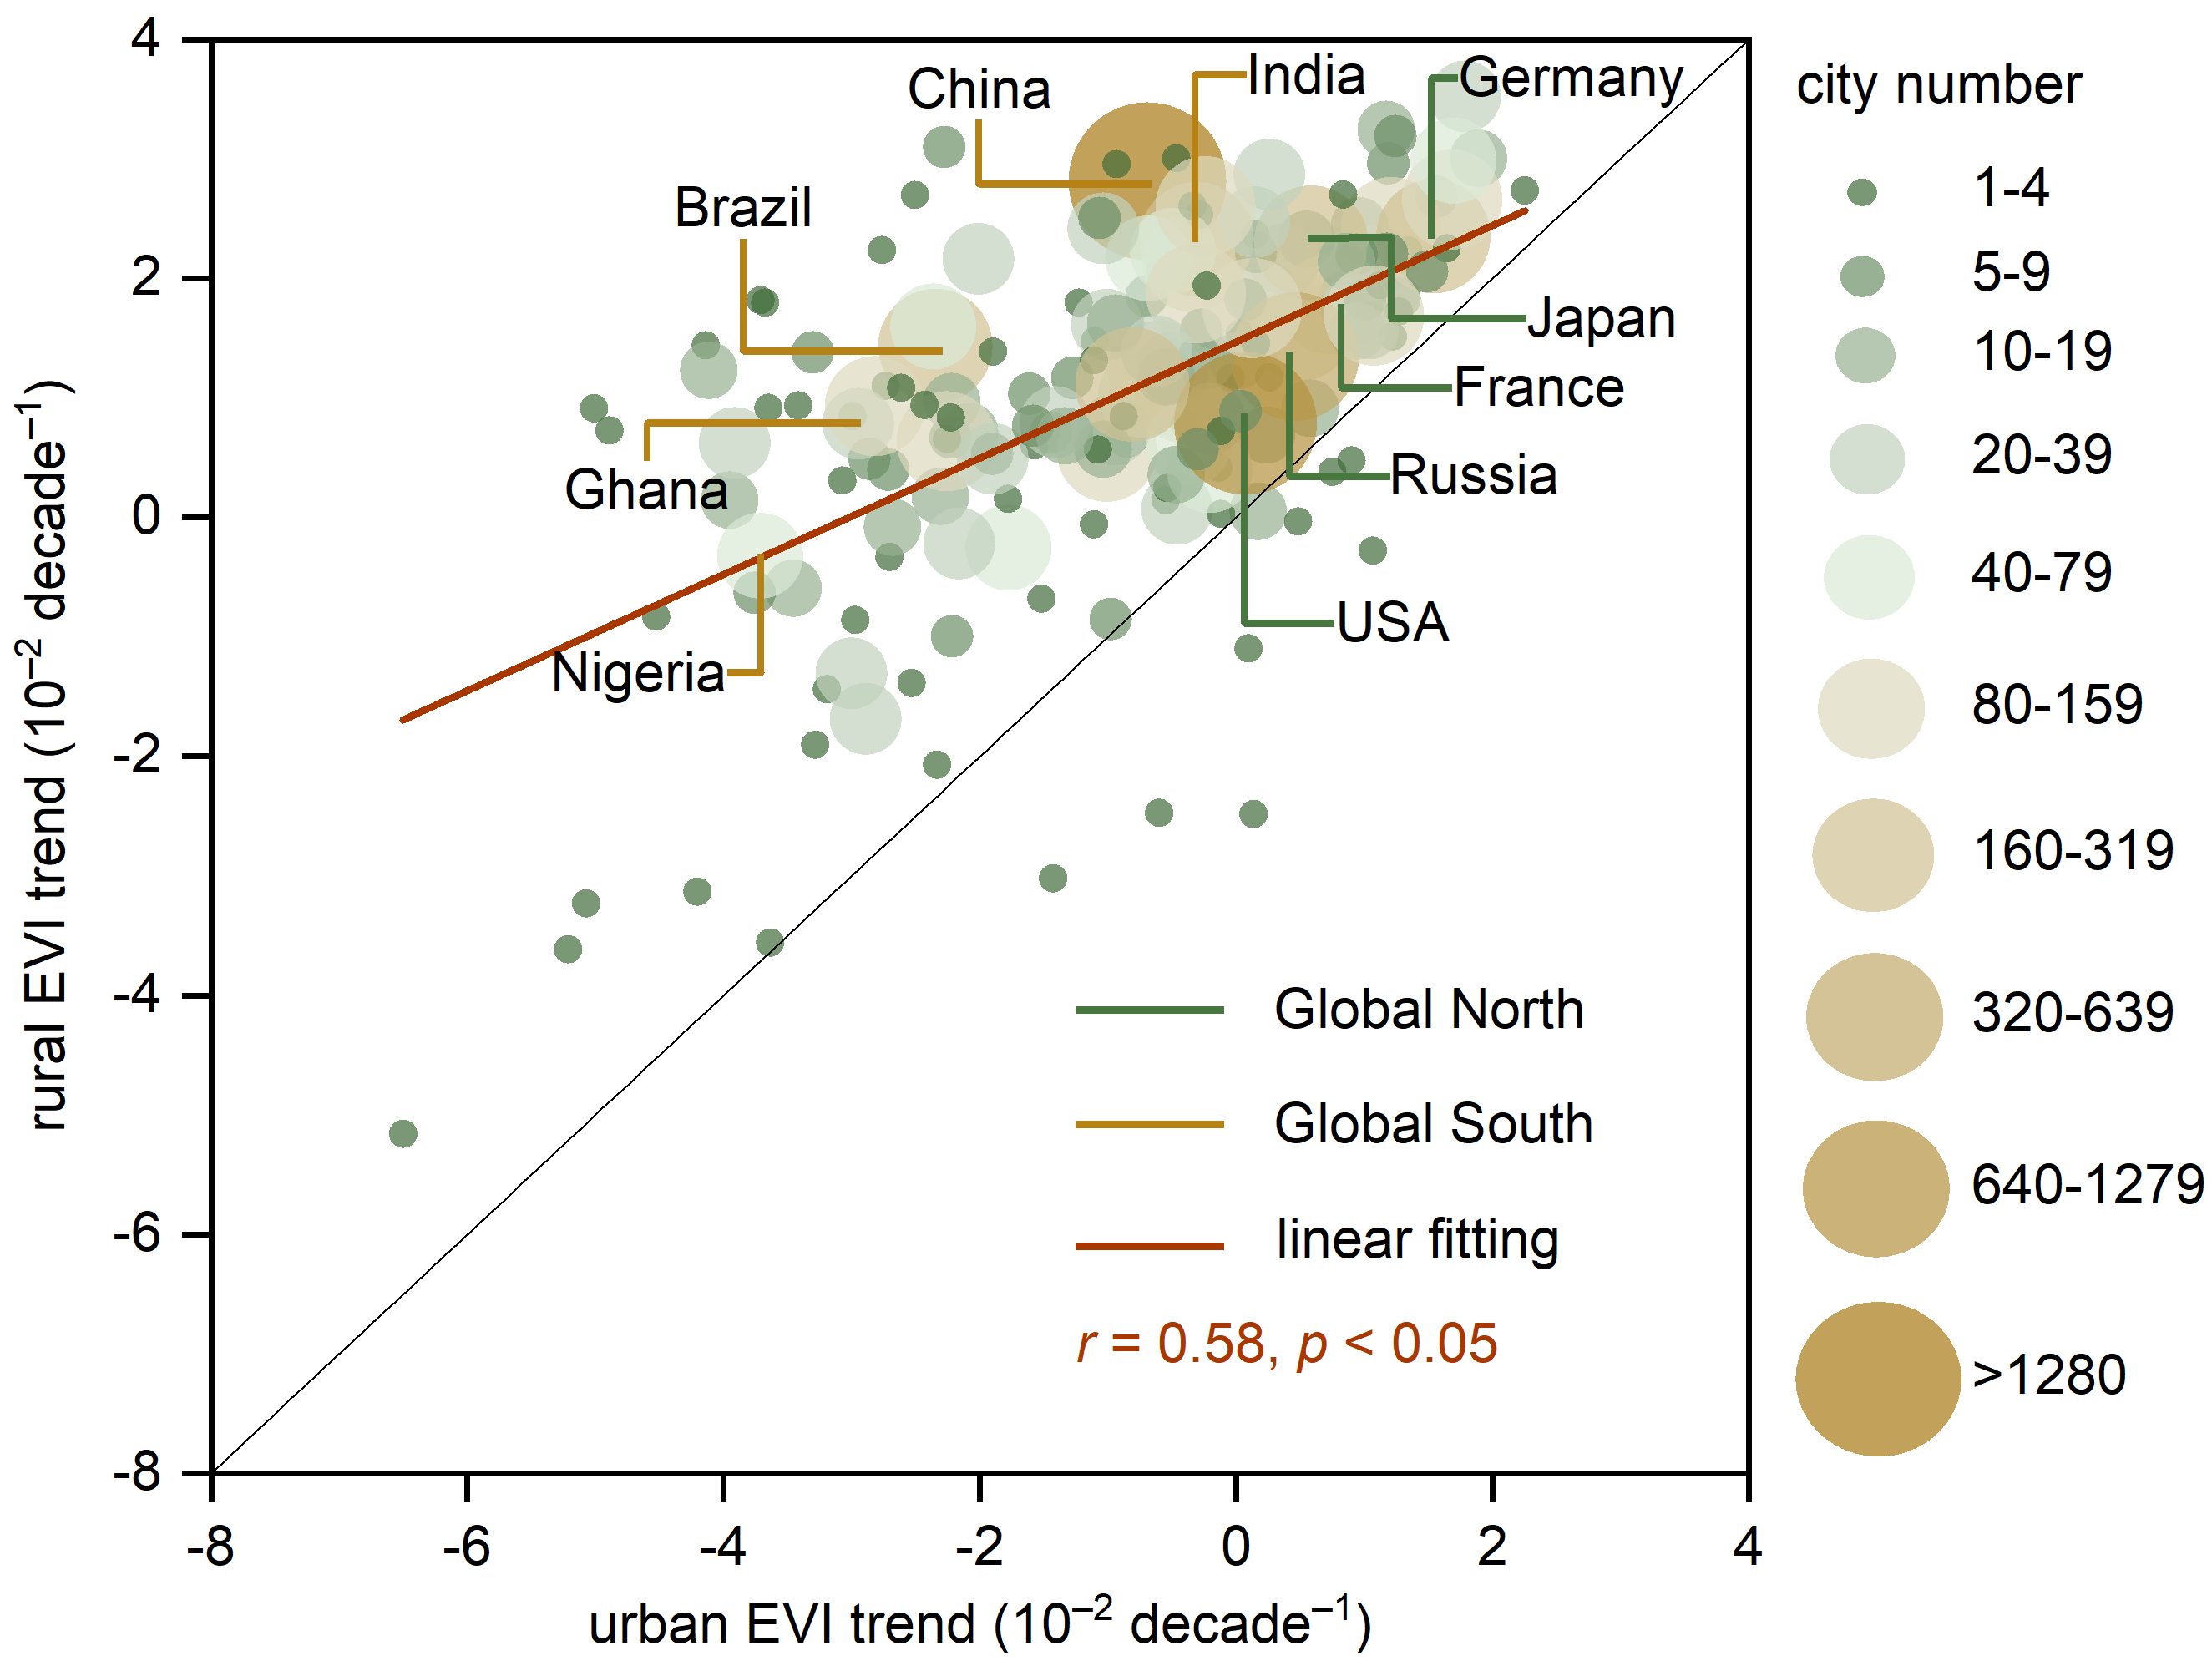


**Fig. S1. Comparison of urban and rural vegetation trends at the national scale, and urban-rural contrasts in vegetation trends in typical Global South and Global North cities.** Linear regression was performed to assess the correlation between urban and rural vegetation trends at the national scale.


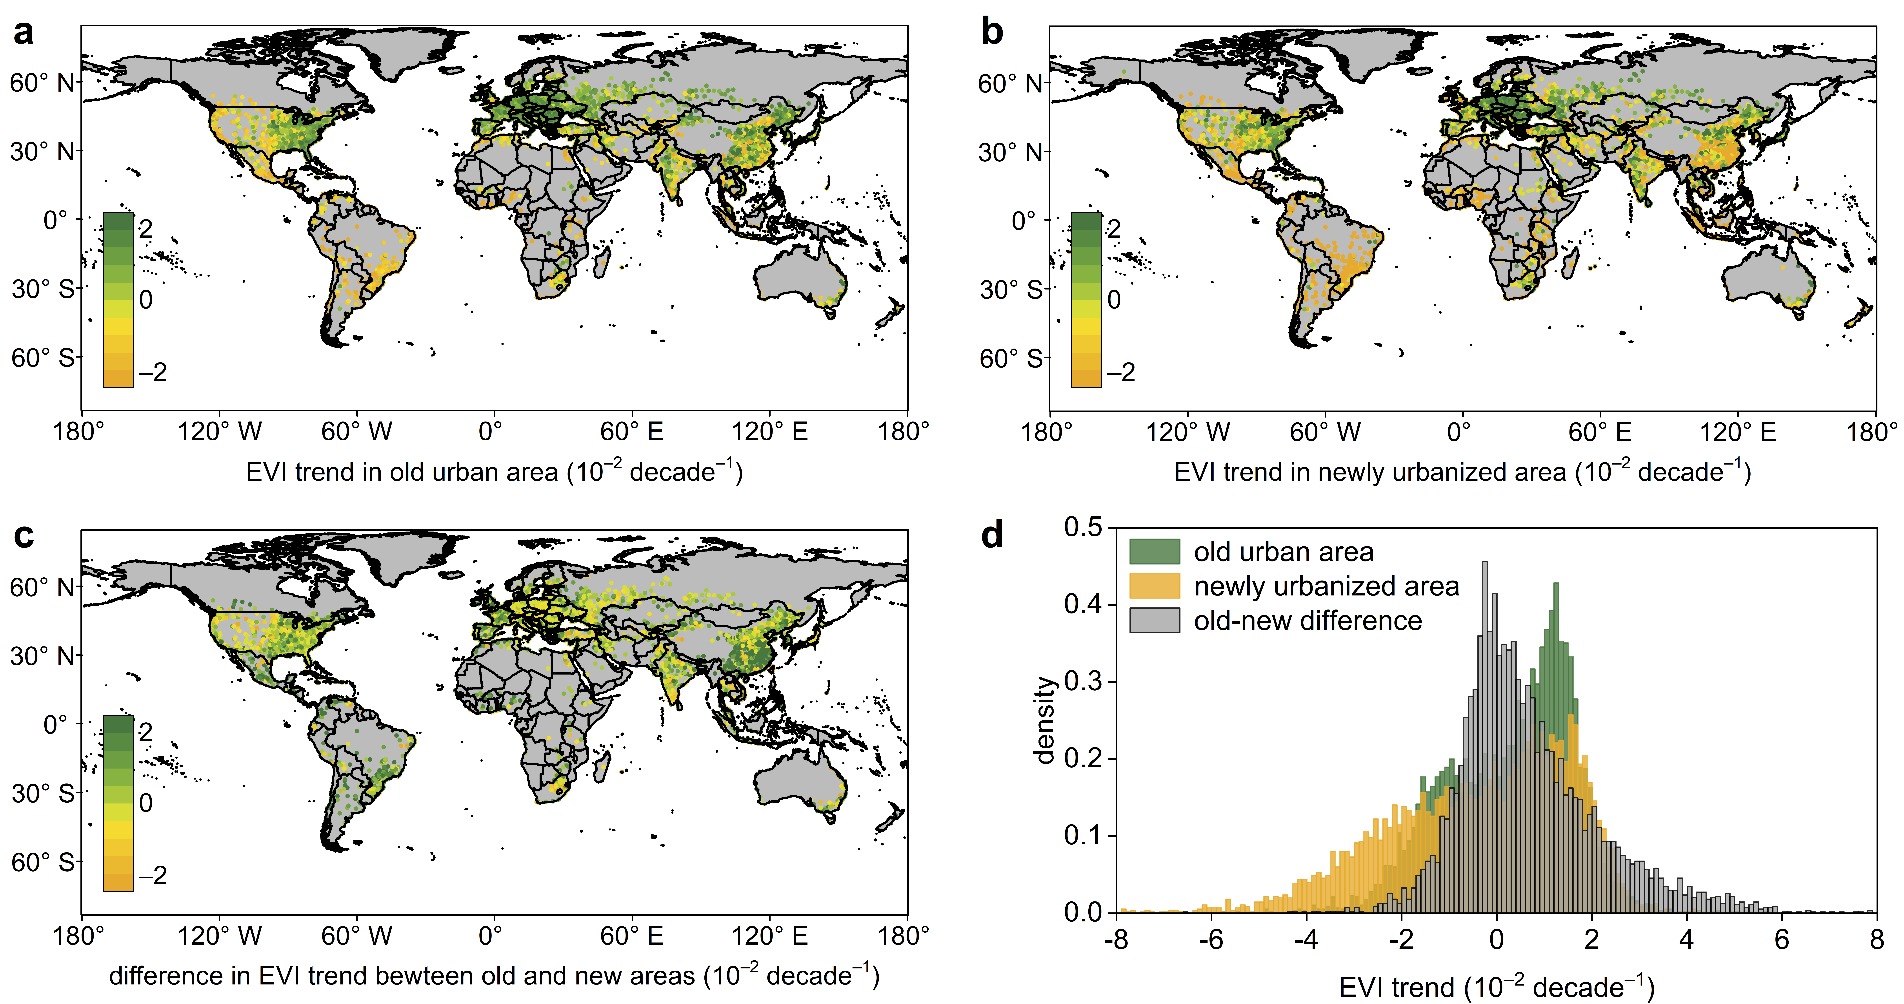


**Fig. S2. Spatial patterns of vegetation trends and their differences between old and new urban areas in 7179 cities worldwide from 2000 to 2022, along with corresponding density histograms.** **a**, Spatial pattern of vegetation trends in old urban areas. **b**, Spatial pattern of vegetation trends in newly urbanized areas. **c**, Spatial pattern of differences in vegetation trends between old and new urban areas. **d**, Density histograms of vegetation trends in old and new urban areas and their differences.


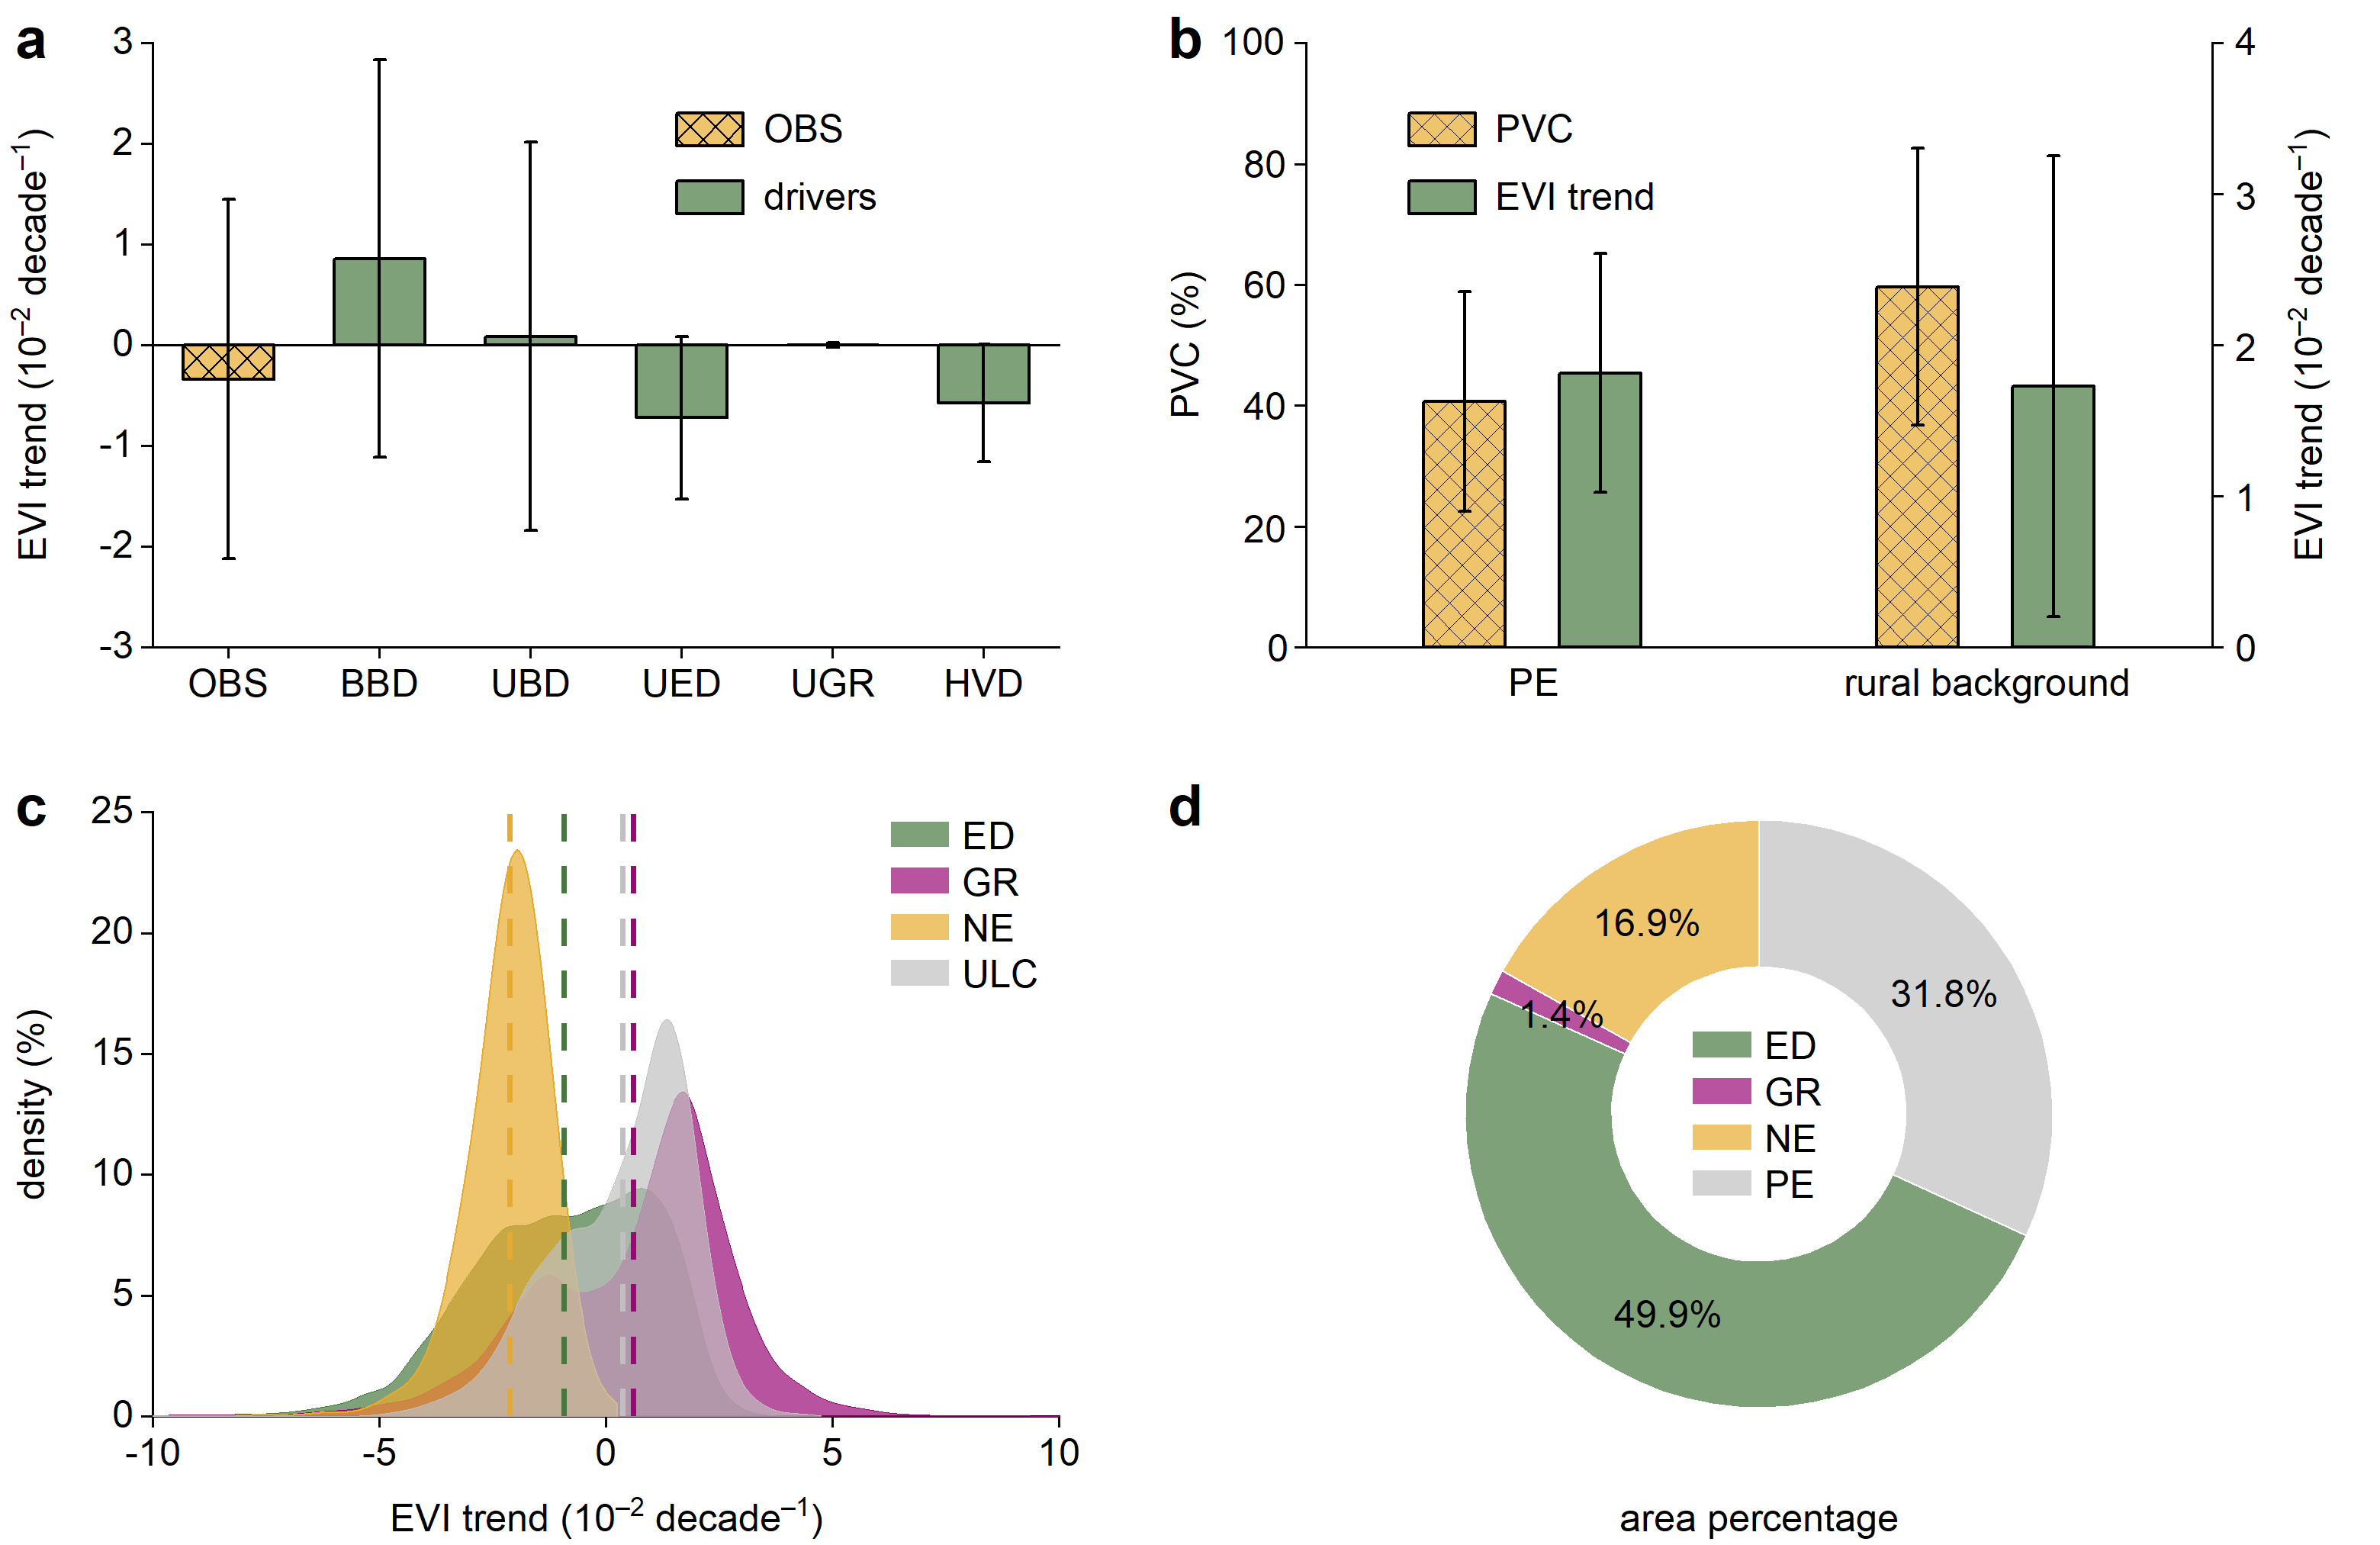


**Fig. S3. Contributions of background biogeochemical drivers (BBD), urban biogeochemical drivers (UBD), urban expansion or densification (UED), urban green recovery (UGR), and human-induced vegetation degradation (HVD) to urban vegetation trends, along with comparisons of vegetation coverage, vegetation trends, and area proportions across urban characteristic regions.** **a**, Contributions of BBD, UBD, UED, UGR, and HVD to urban vegetation trends. **b**, Comparison of vegetation coverage and trends between urban PE-type regions and rural backgrounds. **c**, Density histograms of vegetation trends for ED-type, GR-type, NE-type regions, and their corresponding ULC-type regions. **d**, Area proportions of different urban characteristic regions. PE-type, NE-type, ED-type, and GR-type regions represent areas with a positive EVI trend and unchanged land cover, areas with a negative EVI trend and unchanged land cover, areas undergoing urban expansion or densification, and areas undergoing urban green recovery, respectively.


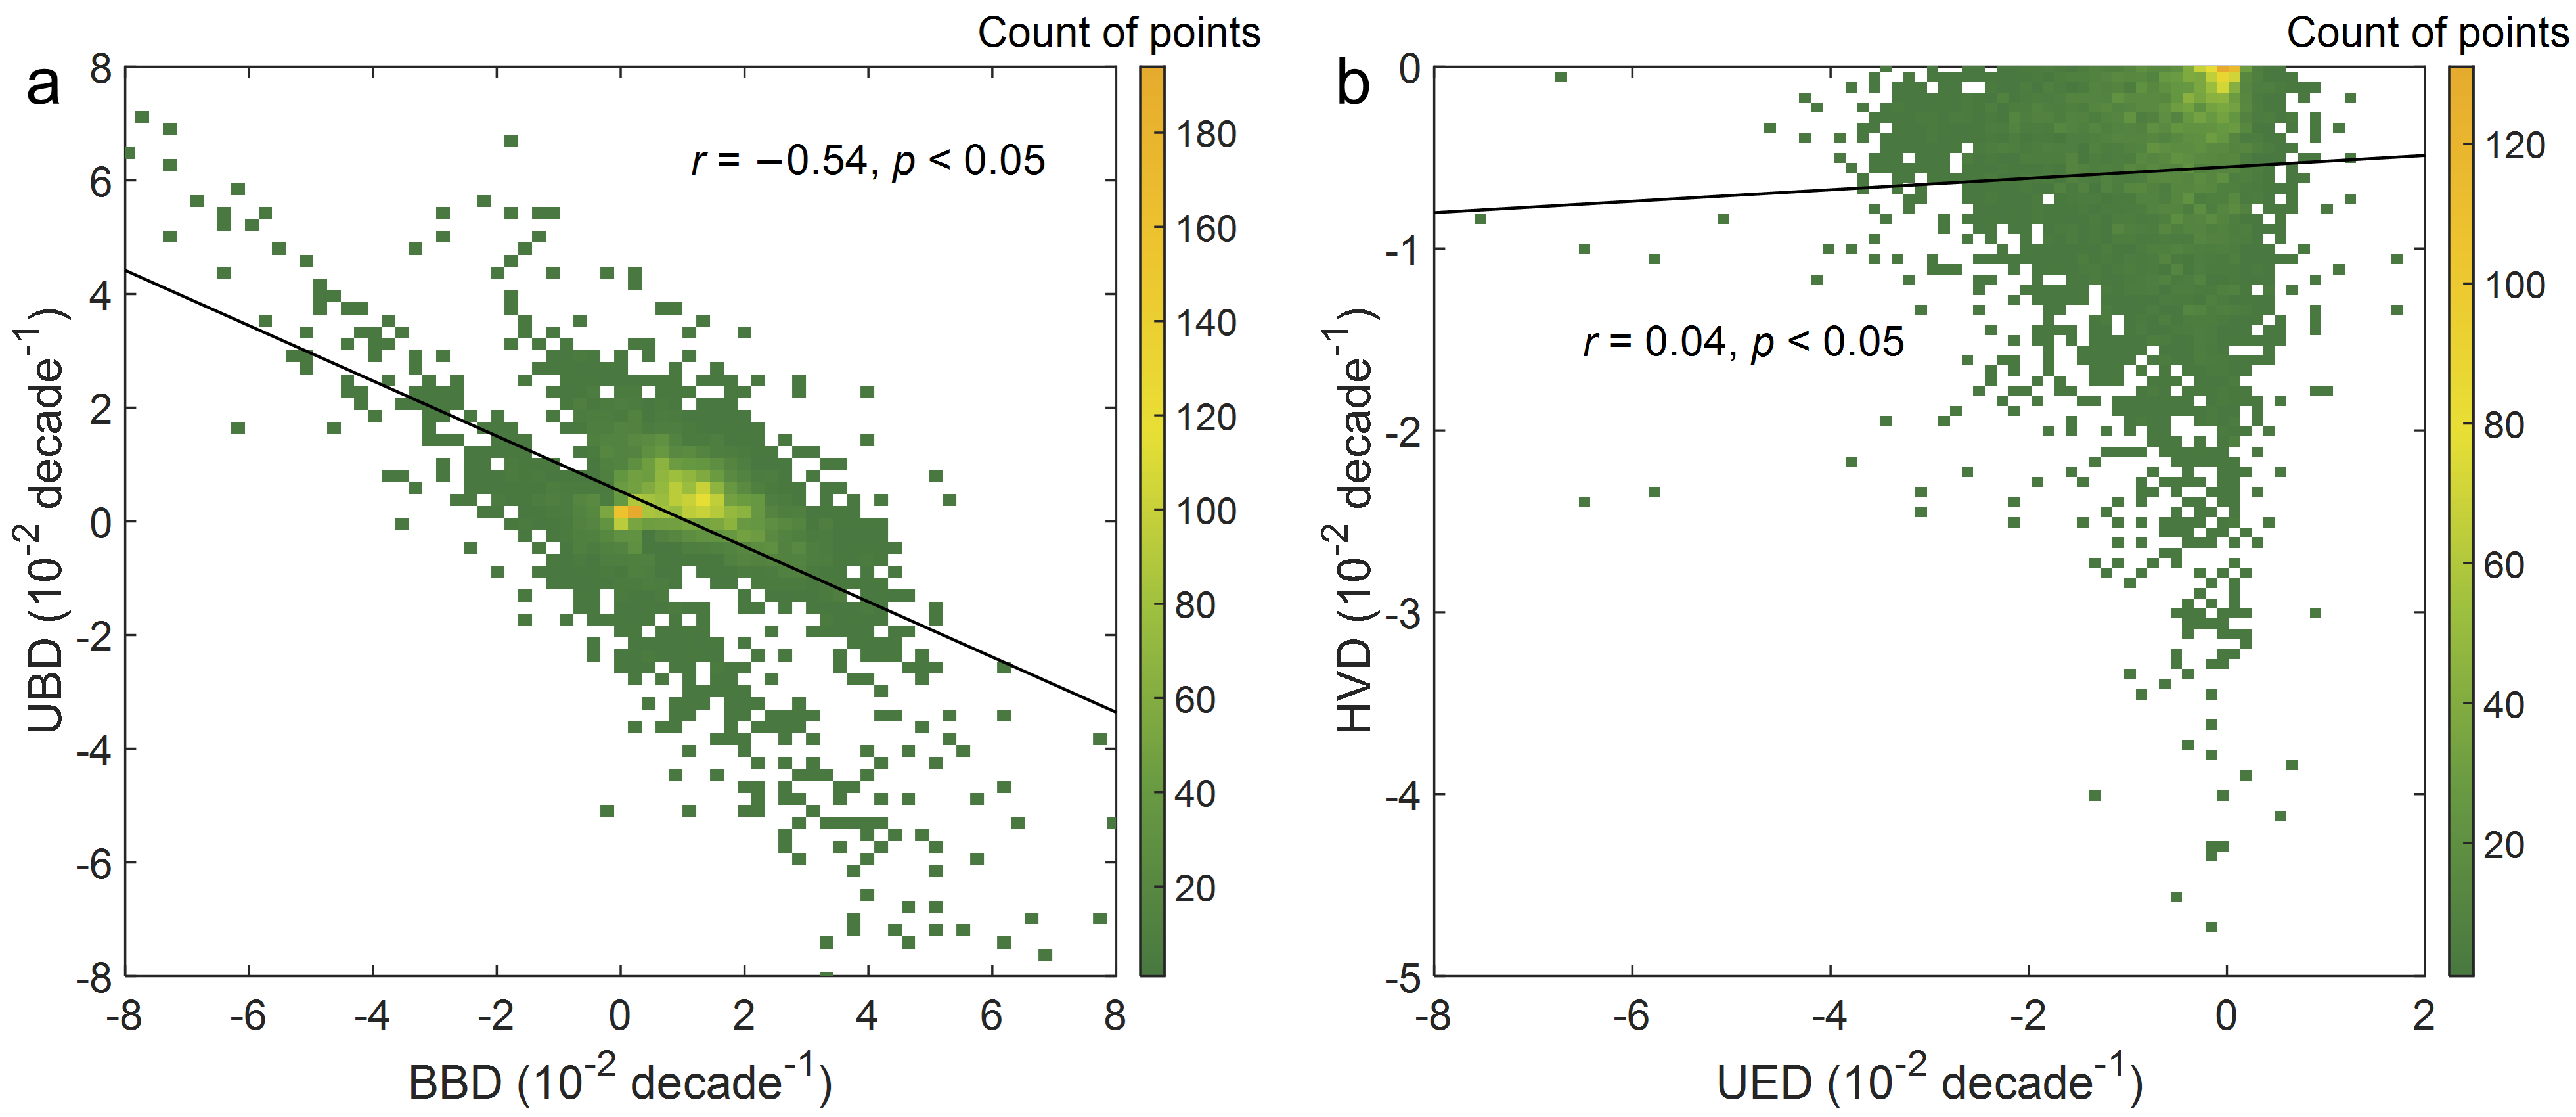


**Fig. S4. The relationship between background biogeochemical drivers (BBD) and urban biogeochemical drivers (UBD), as well as the relationship between urban expansion or densification (UED) and human-induced vegetation degradation (HVD) in affecting urban vegetation trends.** **a**, The relationship between BBD and UBD in influencing urban vegetation trends. **b**, The relationship between UED and HVD in affecting urban vegetation trends.


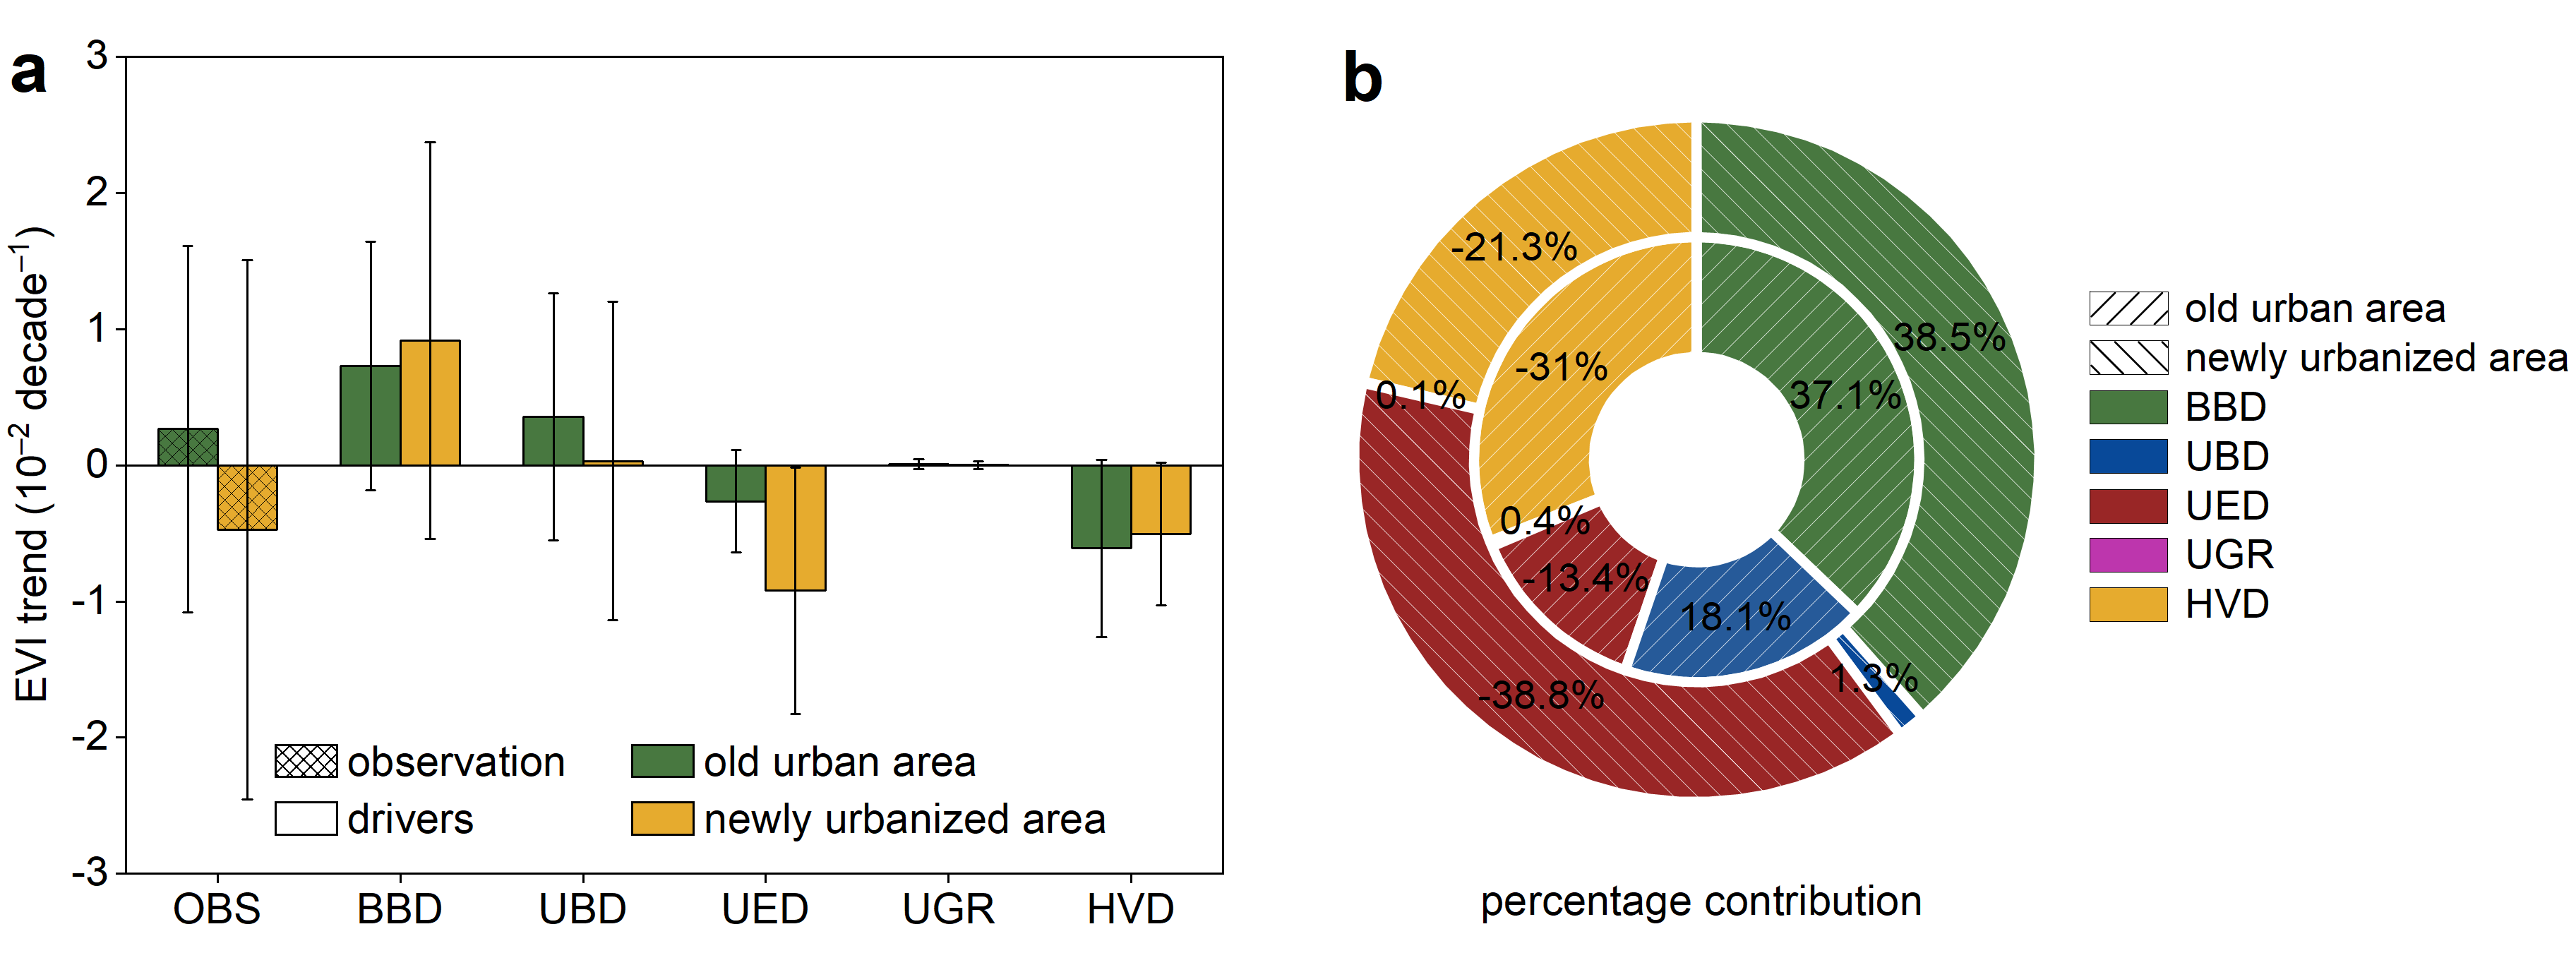


**Fig. S5. Comparison of the contributions of background biogeochemical drivers (BBD), urban biogeochemical drivers (UBD), urban expansion or densification (UED), urban green recovery (UGR) and human-induced vegetation degradation (HVD) to vegetation trends in old urban areas and newly urbanized areas.** **a**, Comparison of the contributions of biogeochemical factors (BBD and UBD) and land-use management (UED, UGR, and HVD) to vegetation trends in old and new urban areas. **b**, The corresponding percentage contributions of biogeochemical factors and land-use management.


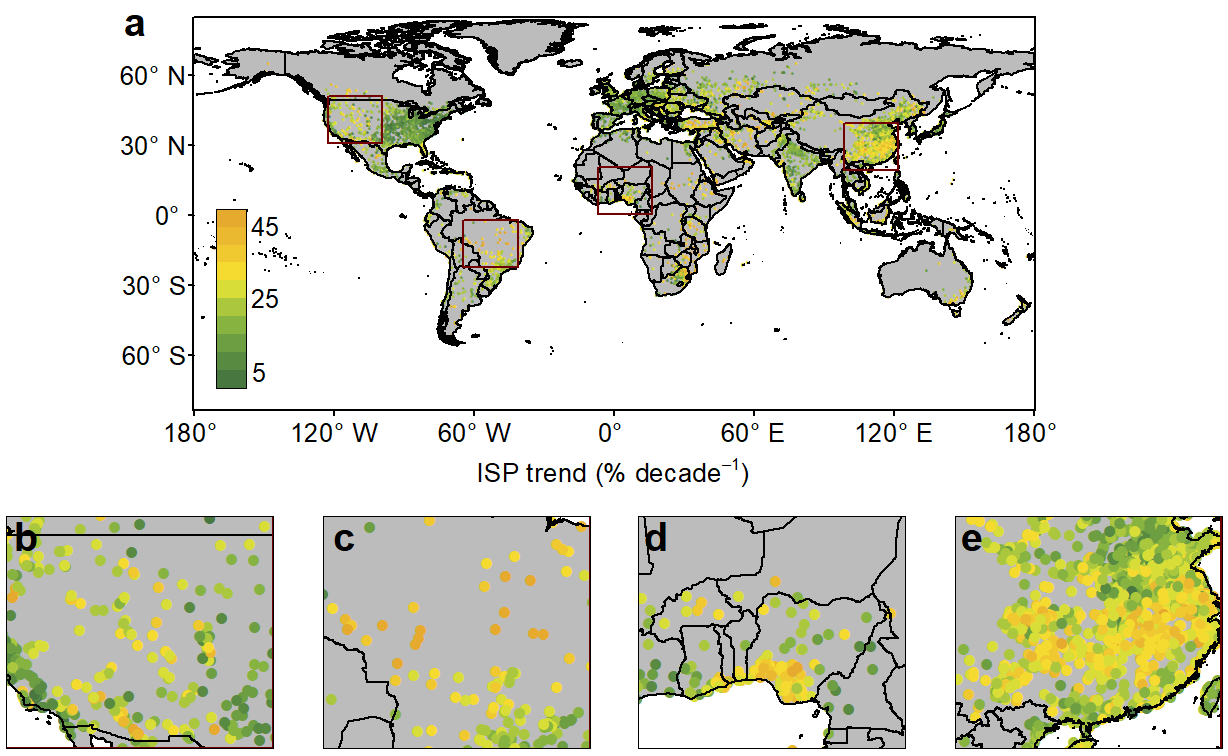


**Fig. S6.** **Urban impervious surface percentage (ISP) trends across 7179 cities globally from 2000 to 2022, along with corresponding values from representative cities where urban biogeochemical drivers (UBD) exerted a major influence on urban vegetation trends.** **a**, Spatial pattern of urban ISP trends across global cities. **b-e**, Urban ISP trends in typical cities with a major influence of UBD on urban vegetation trends.


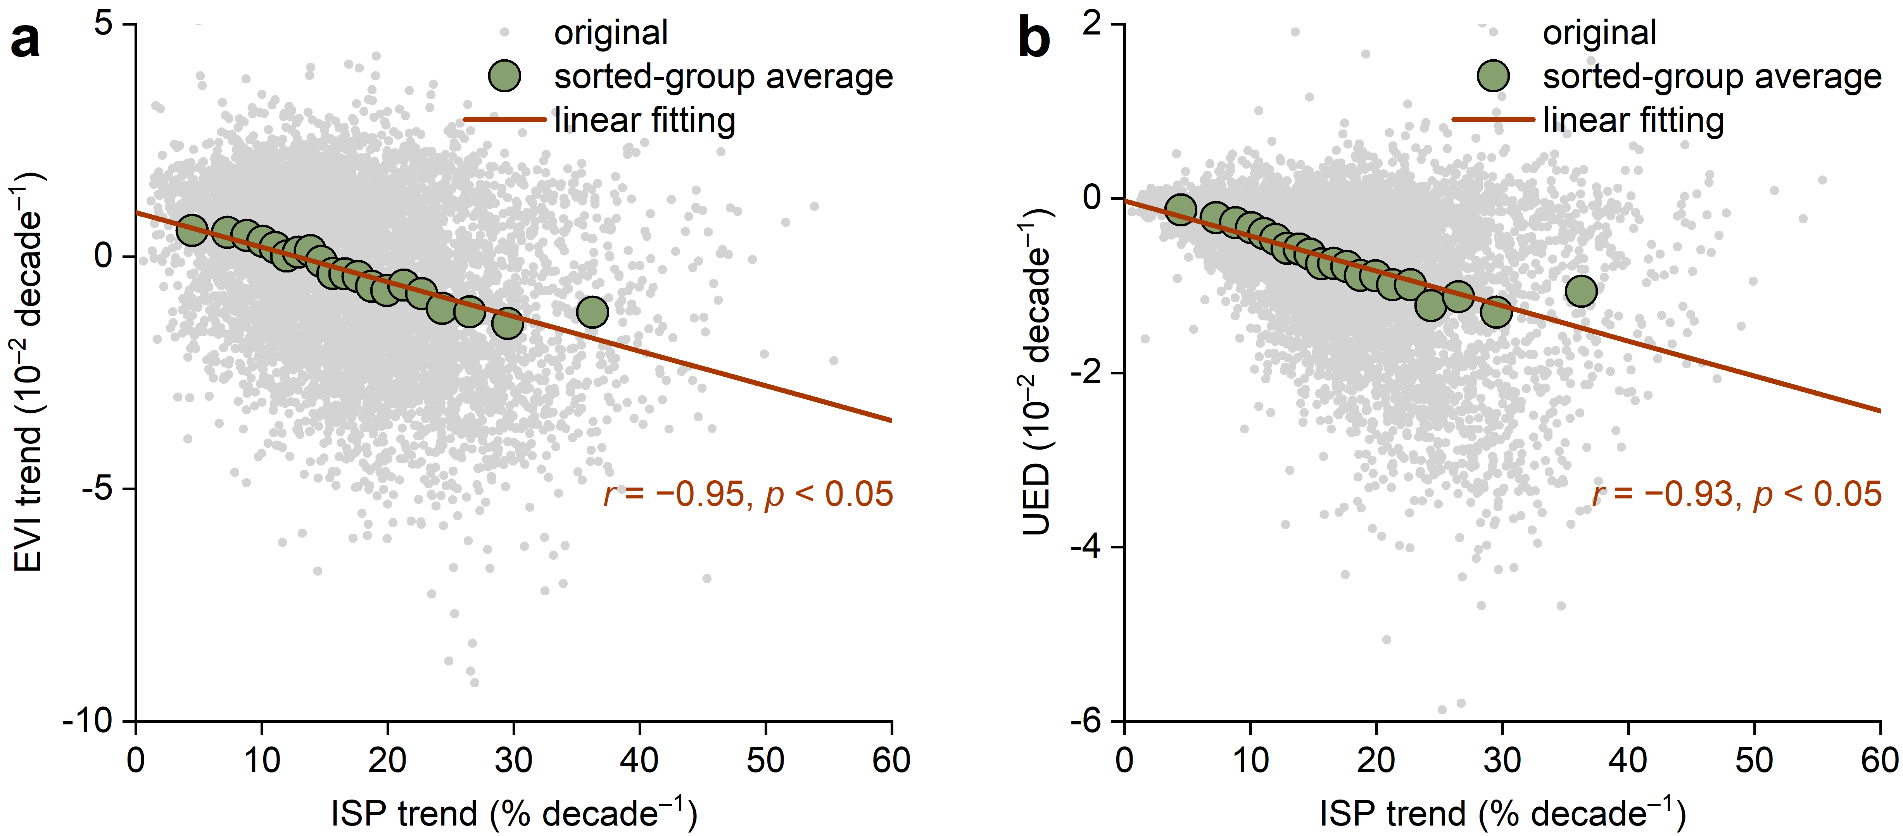


**Fig. S7. The relationship between urban vegetation trends and impervious surface percentage (ISP) trends, as well as the relationship between urban expansion or densification (UED) and ISP trends.** **a**, The relationship between urban vegetation trends and ISP trends. **b**, The relationship between UED and ISP trends.


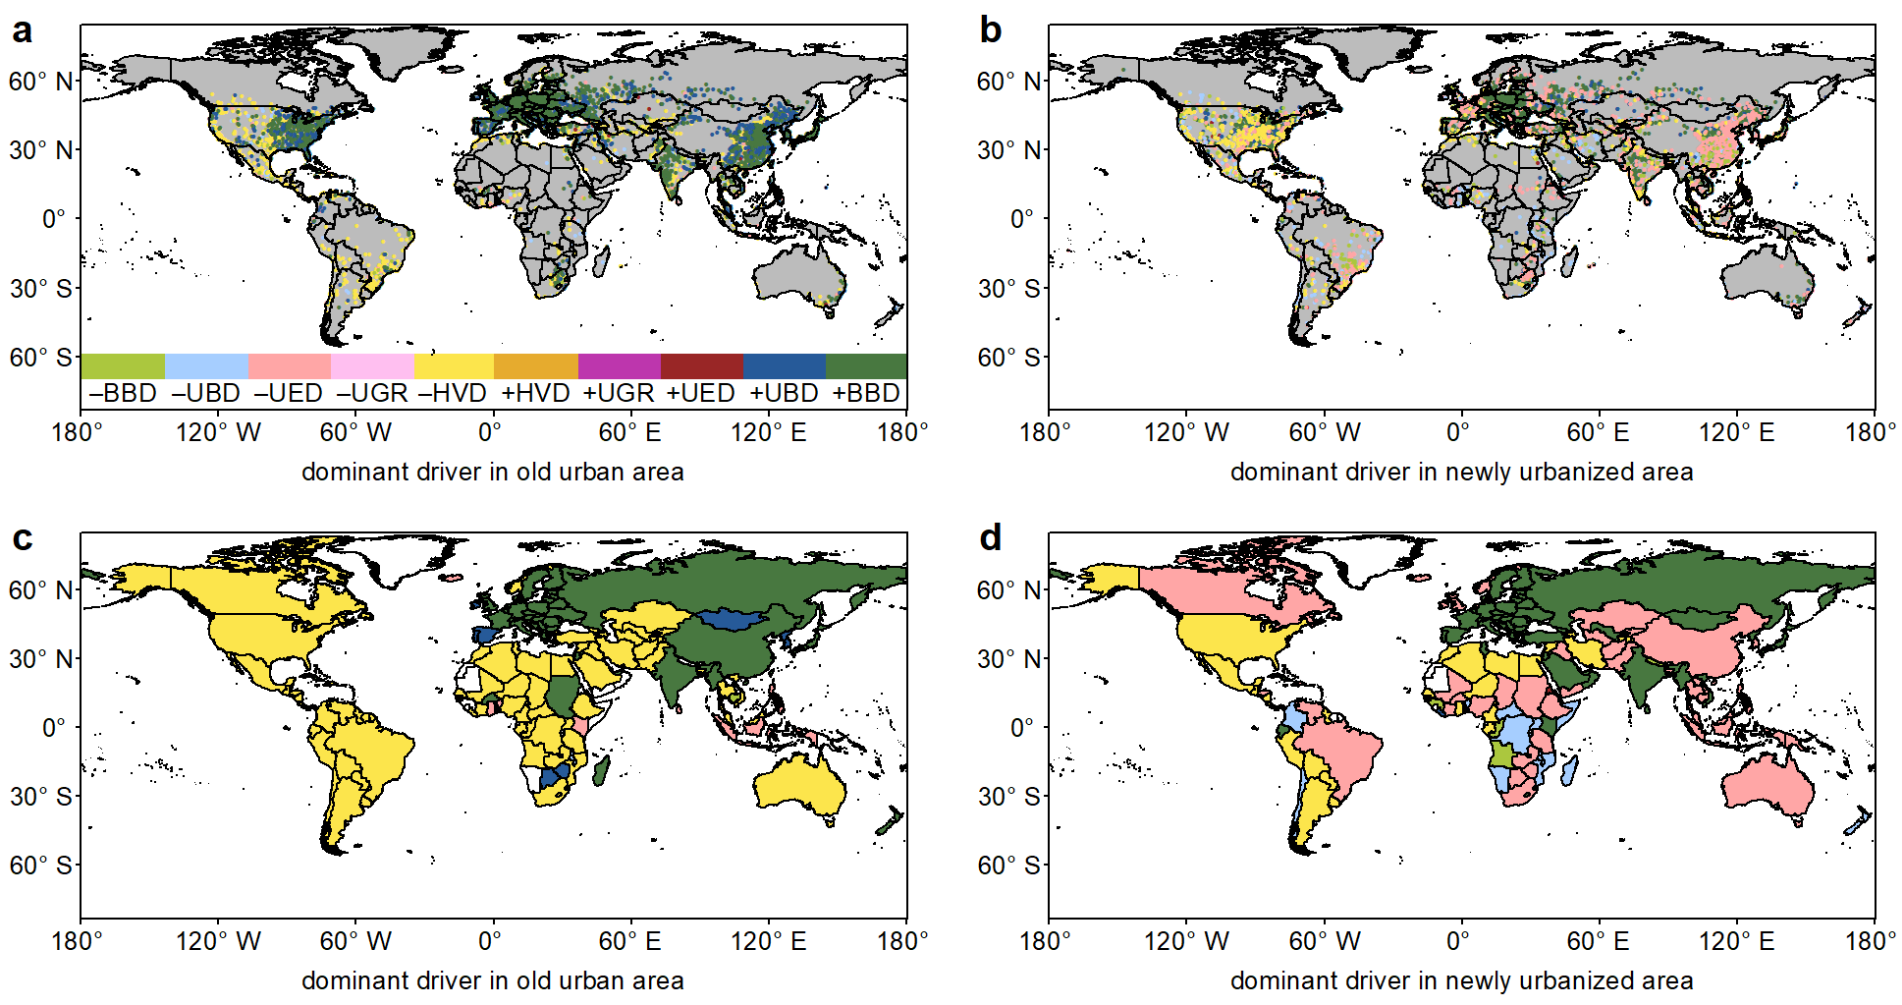


**Fig. S8. Spatial patterns of the dominant factors influencing vegetation trends in old and new urban areas at both city and national scales, under the combined effects of background biogeochemical drivers (BBD), urban biogeochemical drivers (UBD), urban expansion or densification (UED), urban green recovery (UGR) and human-induced vegetation degradation (HVD).** **a**, Spatial pattern of the dominant factors of vegetation trends in old urban areas at the city scale. **b**, Spatial pattern of the dominant factors of vegetation trends in newly urbanized areas at the city scale. **c**, Spatial pattern of the dominant factors of vegetation trends in old urban areas at the national scale. **d**, Spatial pattern of the dominant factors of vegetation trends in newly urbanized areas at the national scale.


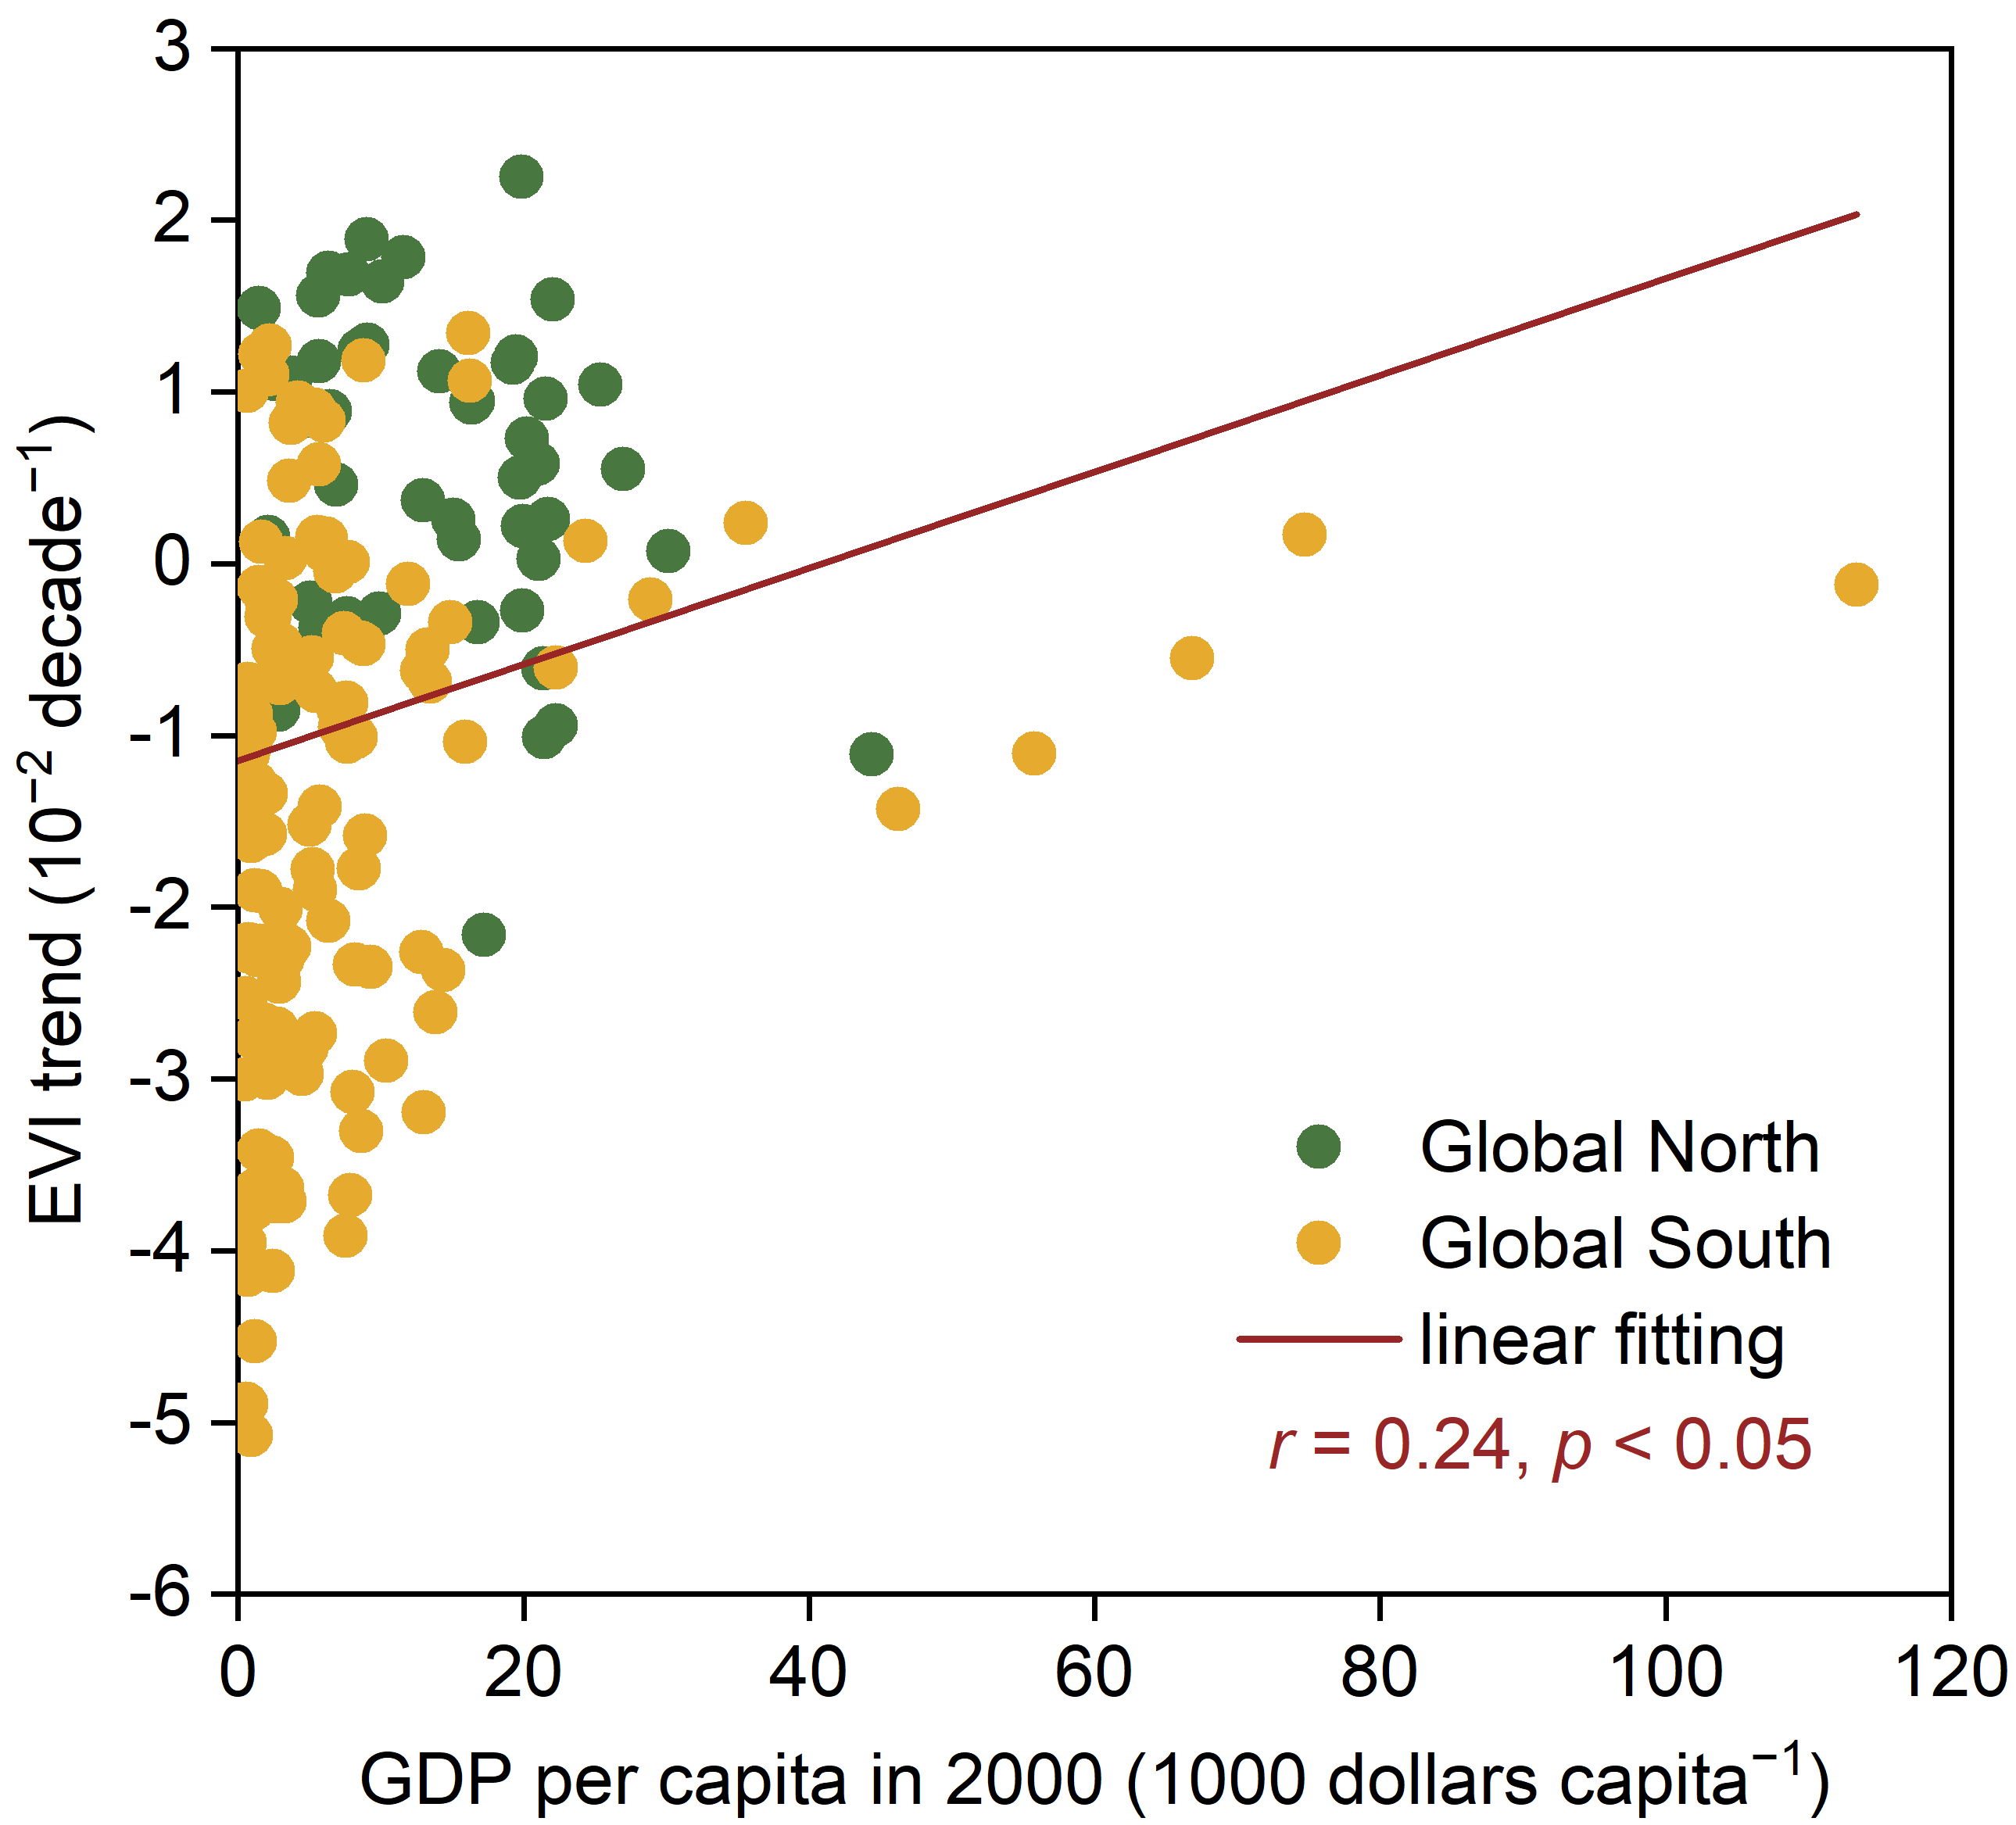


**Fig. S9. The relationship between urban vegetation trends and economic levels.** National-scale Gross Domestic Product (GDP) per capita in 2000 serves as a proxy for economic level.


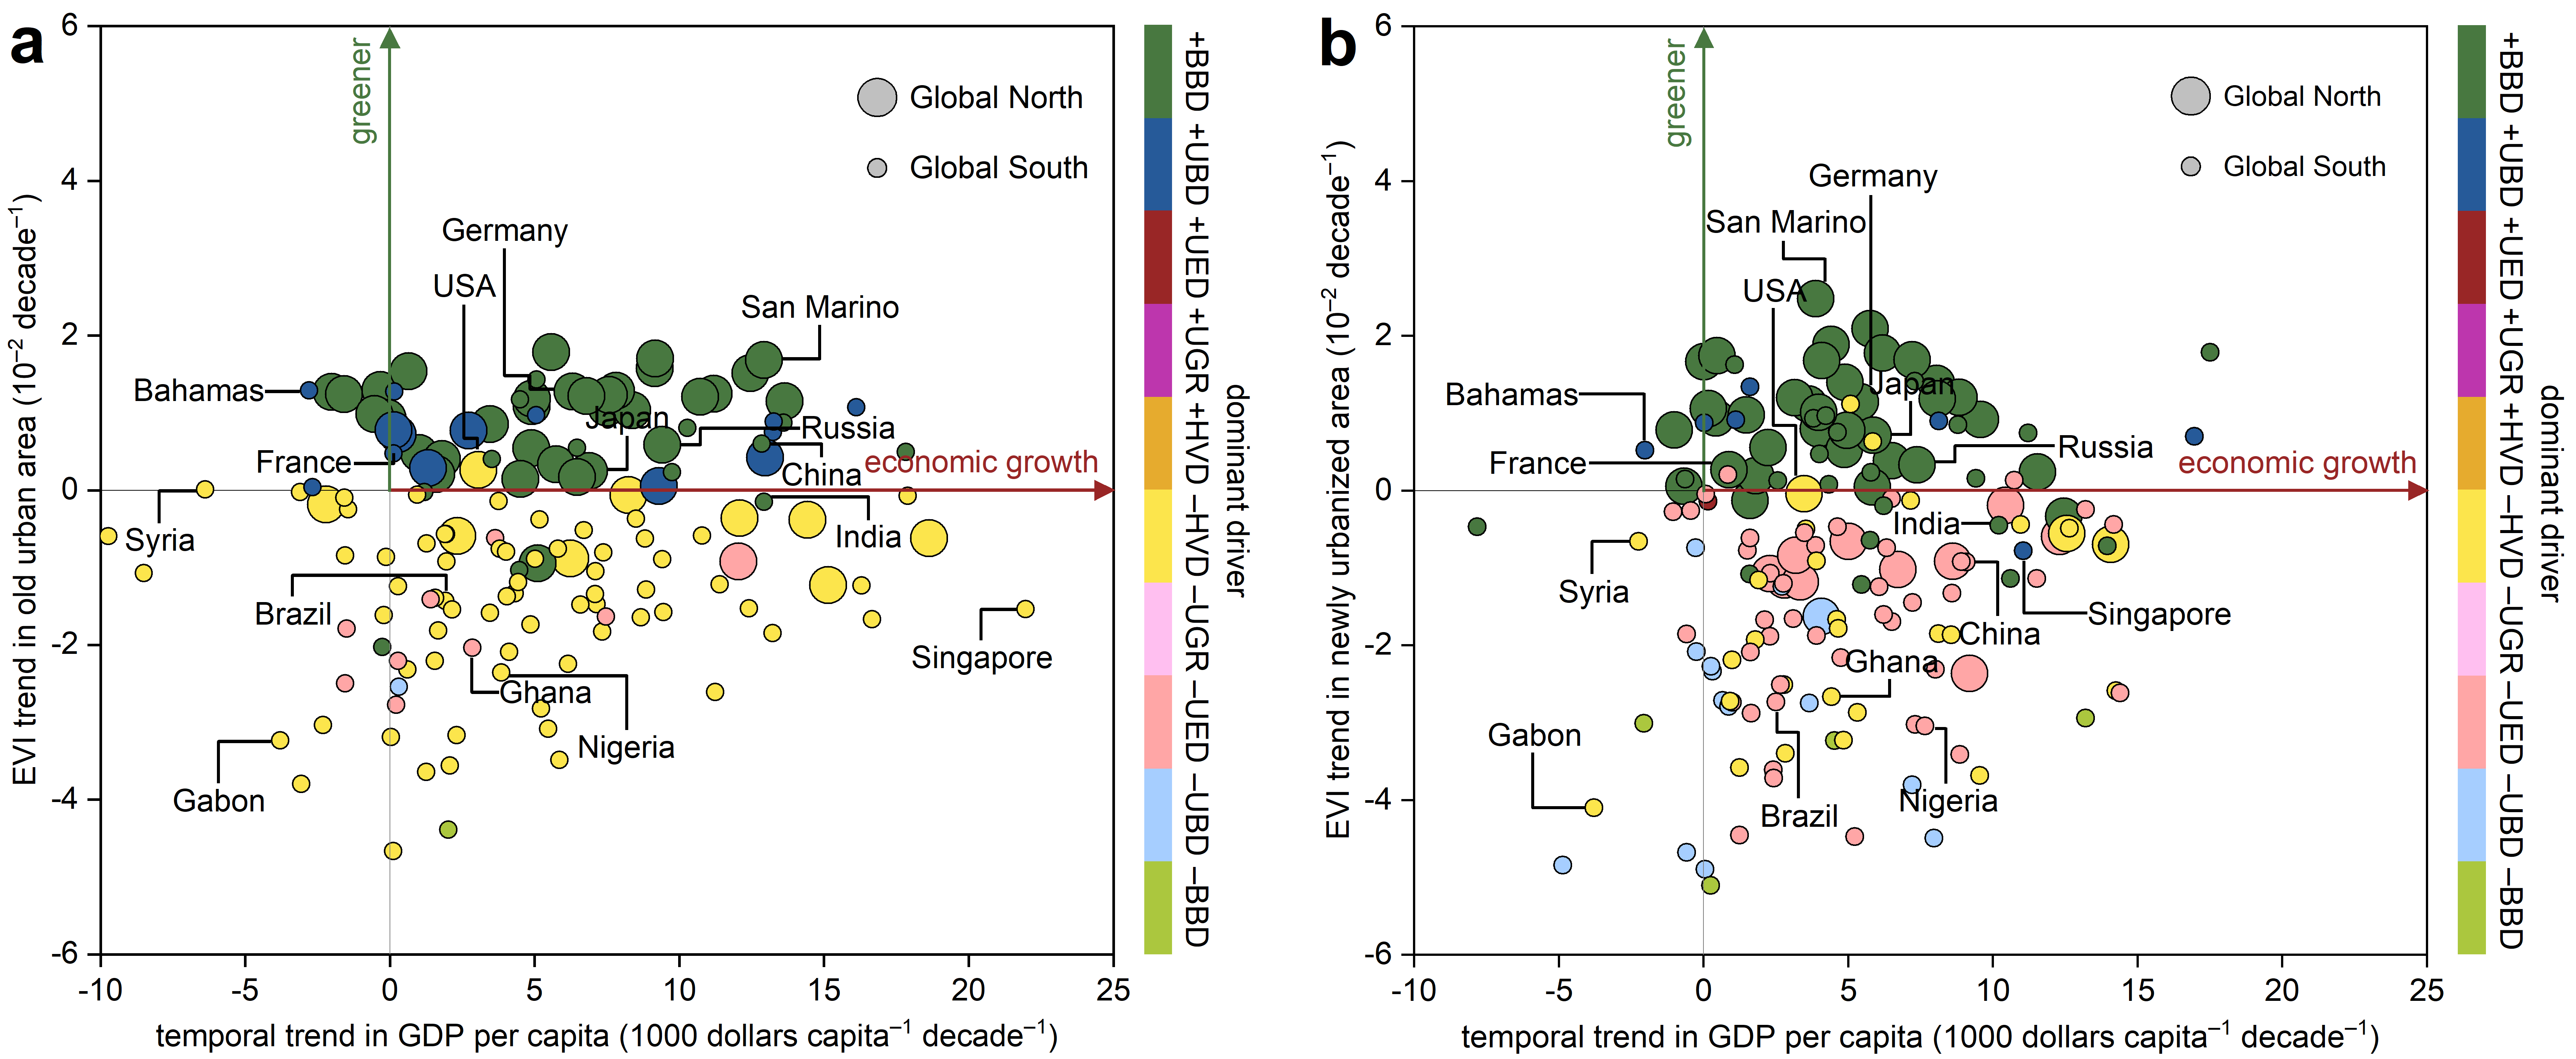


**Fig. S10. The relationship between vegetation trends and economic growth trends in old and new urban areas across the Global South and Global North, along with the dominant role of corresponding biogeochemical drivers or land-use management in affecting urban vegetation trends.** **a**, The relationship between vegetation trends and economic growth trends in old urban areas, and the dominant role of drivers. **b**, The relationship between vegetation trends and economic growth trends in newly urbanized areas, and the dominant role of drivers. Quadrant I represents an environmentally friendly economic development path. Quadrant II indicates an economic structural imbalance under an ecological conservation orientation. Quadrant III represents the dual crisis of ecology and economy. Quadrant IV signifies an ecologically sacrificial economic development path.
